# Supplementary material for: The novel immunobiotic Clostridium butyricum S-45-5 displays broad-spectrum antiviral activity in vitro and in vivo by inducing immune modulation
Source: PubMed Central journal article supplement (PMC10595006; doi:10.3389/fimmu.2023.1242183), 2023-10-10
Supplement: DataSheet_1.pdf [file DataSheet_1.pdf]

## Supplementary Material

### The novel immunobiotic *Clostridium butyricum* S-45-5 displays broad-spectrum antiviral activity *in vitro* and *in vivo* by inducing immune modulation

Kiramage Chathuranga<sup>1†</sup>, Yeseul Shin<sup>2†</sup>, Md Bashir Uddin<sup>1,3,4†</sup>, Jayoung Paek<sup>2</sup>, W.A. Gayan Chathuranga<sup>1</sup>, Yebin Seong<sup>1</sup>, Lu Bai<sup>2</sup>, Hongik Kim<sup>5</sup>, Jeong Hwan Shin<sup>6</sup>, Young-Hyo Chang<sup>2\*</sup>, and Jong-Soo Lee<sup>1\*</sup>

**Correspondence:** Young-Hyo Chang (yhchang@kribb.re.kr), and Jong-Soo Lee(jongsool@cnu.ac.kr)

```
5'GNCGGNGTGCTACCATGCAGTCGAGCGATGAAGCTCCTCCGGGAGTGGATTAGCGGGGACGGGTGAGTAACACGTGGGTAACCTGCCTCATAGAGGGGAATAGCC
TTTCGAAAGGAAGATTAATACCGCATAAGATTGTAGTACCGCATGGTACAGCAATTAAGGAGTAATCCGCTATGAGATGGACCCGCGTCGCATTAGCTAGTTGGTGAG
GTAACGGCTACCAAGGCGACGATGCGTAGCCGACCTGAGAGGGTATCGGCCACATTGGGACTGAGACACGGCCAGACTCCTACGGGAGGCAGCAGTGGGAATA
TTGCACAATGGGGGAAACCTGATGCAGCAACGCCGCGTGAGTGATGACGGTCTTCGGATTGTAAAGCTCTGTCTTTAGGGACGATAATGACGGTACCTAAGGAGGAA
GCCACGGCTAACTACGTGCCAGCAGCCGCGGTAATACGTAGGTGGCAAGCGTTGTCCGGATTACTGGGCGTAAAGGGAGCGTAGGTGGATATTTAAGTGGGATGTGA
AATACCCGGGCTAACCTGGGTGCTGCATTCCAAACTGGATATCTAGAGTGCAGGAGAGGAAAGGAGAATTCCTAGTGTAGCGGTGAAATGCGTAGAGATTAGGAAGA
ATACCAGTGGCGAAGGCGCCTTTCTGGACTGTAAGTACACTGAGGCTCGAAAGCGTGGGGAGCAAACAGGATTAGATACCTGGTAGTCCACGCGTAAACGATGAA
TACTAGGTGTAGGGGTTGTCTGACCTCTGTGCCCGCTAACGCATTAAGTATTCCGCCTGGGGAGTACGGTCGCAAGATTAAGTAACTCAAAGGAATTGACGGGGCCC
GCACAAGCAGCGGAGCATGTGGTTAATTCGAAGCAACGCGAAGAACCTTACCTAGACTTGACATCTCCTGAATTAATCTGTAAATGGAGGAAGCCACTTCGGTGGCAGG
AAGACAGGTGGTGCATGGTTGTCGTGCTGAGTGTGGGTTAAGTCCCGCAACGAGCGCAACCTTATTGTTAGTTGCTACCATTTAGTTGAGCACTCTA
GCGAGACTGCCCGGGTTAACCGGGAGGAAGGTGGGATGACGTCAAATCATCATGCCCCTTATGTCTAGGGGTACACACGTGCTACAATGGTCGGTACAATGAGATC
AACCTCGCGAGAGTGAGCAAATAAAAACCGATCTCAGTTCGGATTGTAGGCTGAAACTCGCTACATGAAGCTGGAGTTGCTAGTAATCGCGAATCAAATGTCGCGG
TGAATACGTTCCCGGCCTGTACACACGCCCGTACACCATGAGAGTTGGCATACCAAGTTCGTGAGCTAACCGCAGAGCAGCGACCTATGGTAGGTGAGCGATTGNG
GTGAGNCGTAACAGGG-3'
```

#### Supplementary Figure S1.

RNA sequencing result of the *Clostridium butyricum* S-45-5. The isolated strain was identified by 16S rRNA gene analysis. To amplify 16S rDNA from purified isolates, polymerase chain reactions (PCRs) were carried out using forward primer 27F (5'-agagtttgatcctcag-3') and a reverse primer 1492R (5'-ggttacctgttacgactt-3'). Amplified genes were identified through sequencing analysis by Biofact Co.Ltd.

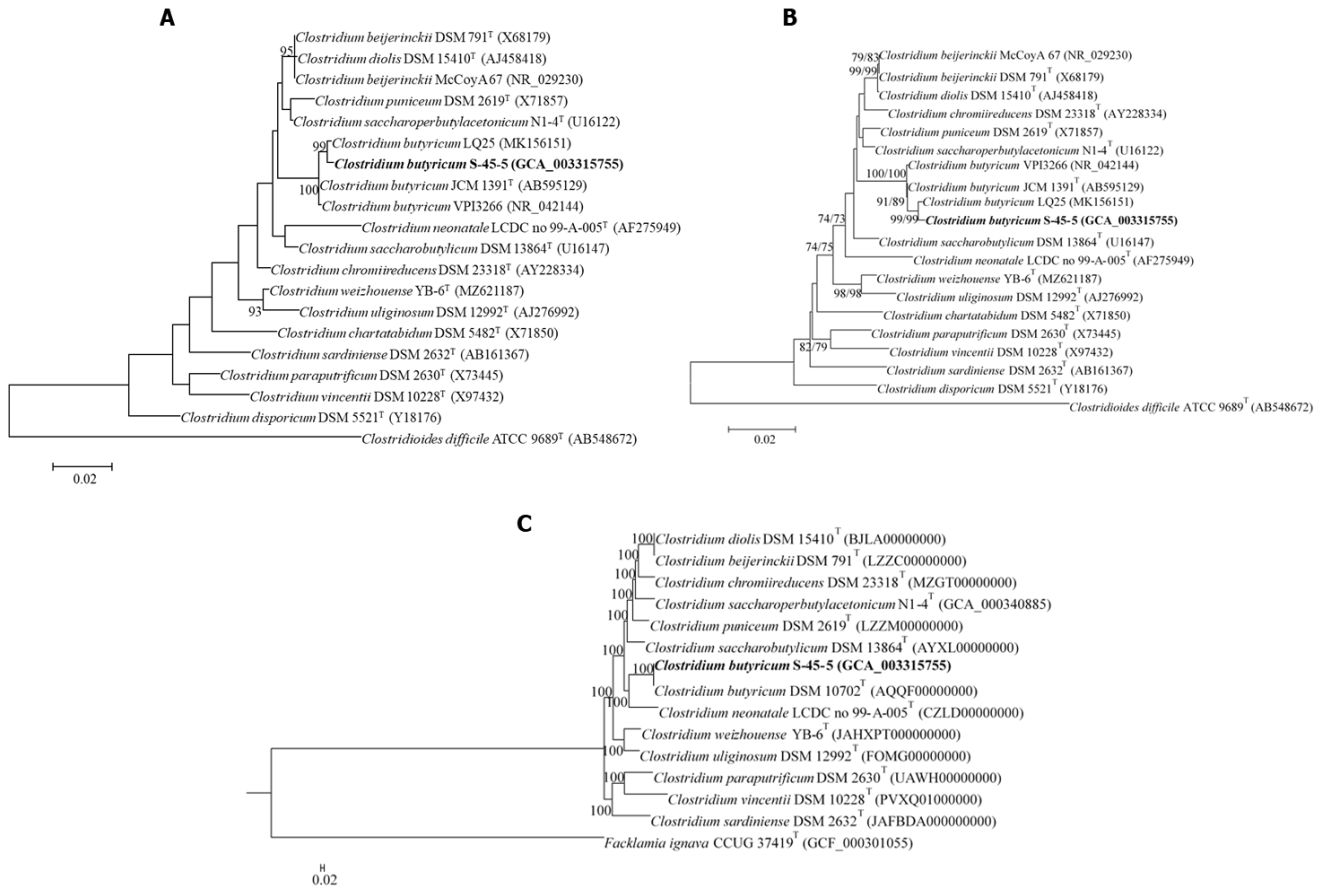

### Supplementary Figure S2.

(A) Phylogenetic consensus tree based on 16S rRNA gene sequence of isolate *C. butyricum* S-45-5, reconstructed with the maximum-likelihood (ML), indicating the taxonomic positions of isolate and its close relatives. Bootstrap values (>70 %) calculated for 1000 subsets were shown at branch nodes. *Clostridioides difficile* ATCC 9689T served as an outgroup. Bar, 0.02 substitutions per nucleotide position. (B) Phylogenetic consensus tree based on 16S rRNA gene sequence of isolate *C. butyricum* S-45-5, reconstructed with the neighbor-joining (NJ) and the minimum-evolution (ME), indicating the taxonomic positions of isolate and its close relatives. Bootstrap values (>70%) calculated for 1000 subsets were shown at branch nodes. *Clostridioides difficile* ATCC 9689T served as an outgroup. Bar, 0.02 substitutions per nucleotide position. (C) Molecular phylogenetic analysis of isolate *C. butyricum* S-45-5 using default parameters (>100 core genes) by auto MLST. Bootstrap values (>70%) calculated for 1000 subsets were shown at branch nodes. *Facklamia ignava* CCUG 37419T was served as an outgroup. Bar, 0.02 substitutions per nucleotide position.

**A**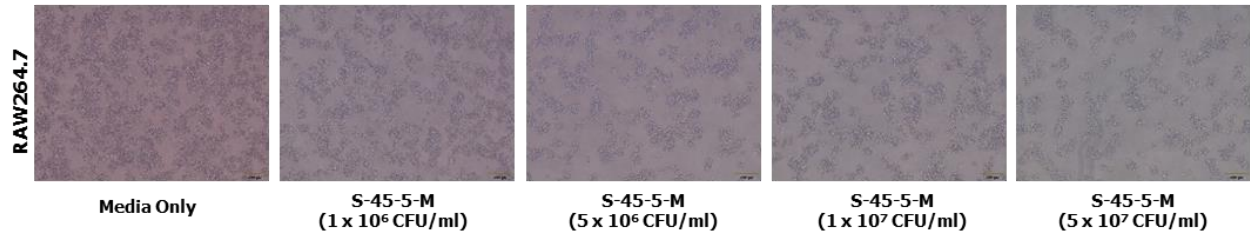**B**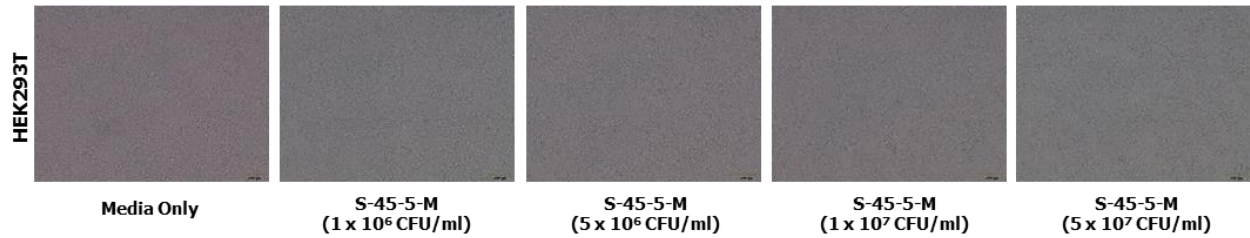**C**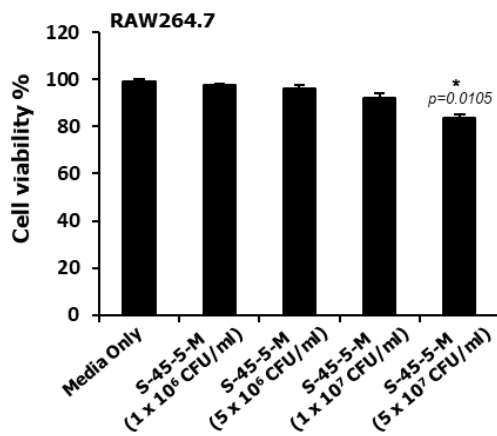**D**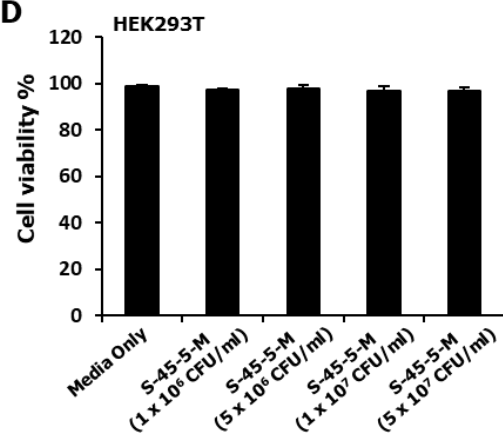**Supplementary Figure S3.**

RAW264.7 cells or HEK293T cells were seeded in 12 well cell culture plates with the cell number of  $3 \times 10^5$  cells/well. Twelve hours later, indicated colony-forming units (CFU) of *C. butyricum* S-45-5 were added to the cell medium. (A, B) At 24-hour post treatment images were obtained. (C, D) Cell viability was determined by trypan blue exclusion assay at the same time point. (S-45-5-M: *C. butyricum* S-45-5-Mix). Cell viability results are expressed as mean  $\pm$  standard deviations (SD). Error bars indicate the range of values obtained from counting duplicates in three independent experiments (\*  $p < 0.05$  regarded as a significant difference).

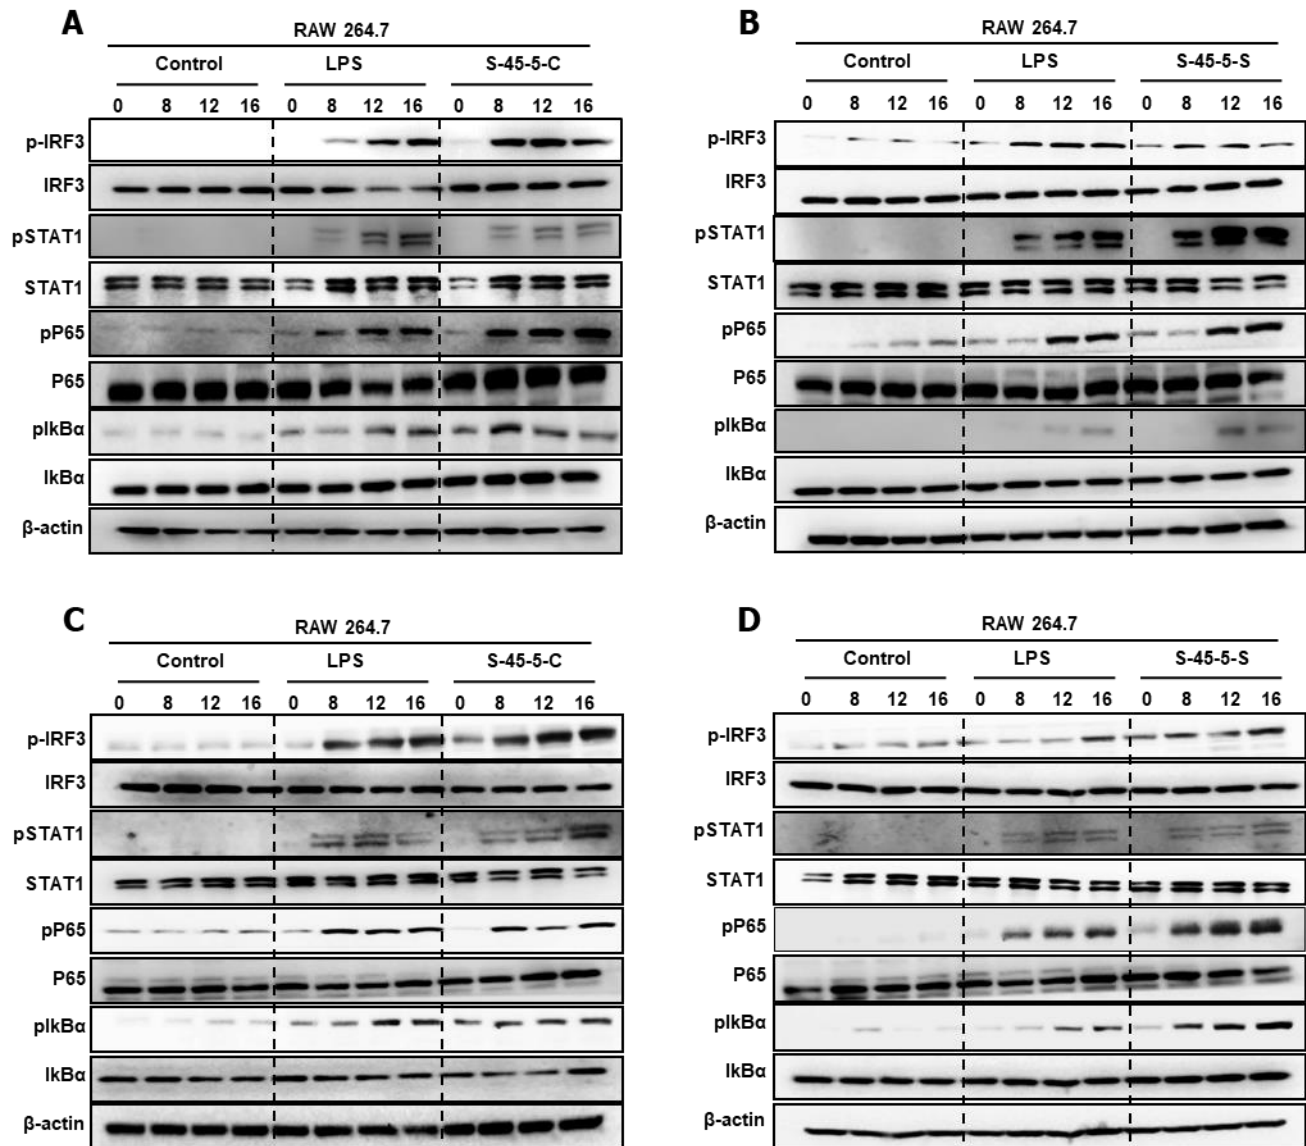**Supplementary Figure S4.**

Activation of signal molecules present in Type-I IFN and NF- $\kappa$ B pathways were detected based on their phosphorylation status. RAW264.7 cells were treated with PBS, LPS (100 ng/ml) or *C. butyricum* S-45-5-Cell ( $1 \times 10^6$  CFU/ml) or *C. butyricum* S-45-5-Sup ( $1 \times 10^6$  CFU/ml) and cells were harvested at 0, 8, 12 and 16 hpt. Expression of the phosphorylated and non-phosphorylated forms of IRF3, STAT1, p65, and I $\kappa$ B $\alpha$  was analyzed time-dependently by immunoblotting.  $\beta$ -actin was used to confirm equal loading of proteins. A (*C. butyricum* S-45-5-Cell), B (*C. butyricum* S-45-5-Sup) (Technical repeat 2 results), C (*C. butyricum* S-45-5-Cell), D (*C. butyricum* S-45-5-Sup) (Technical repeat 3 results).

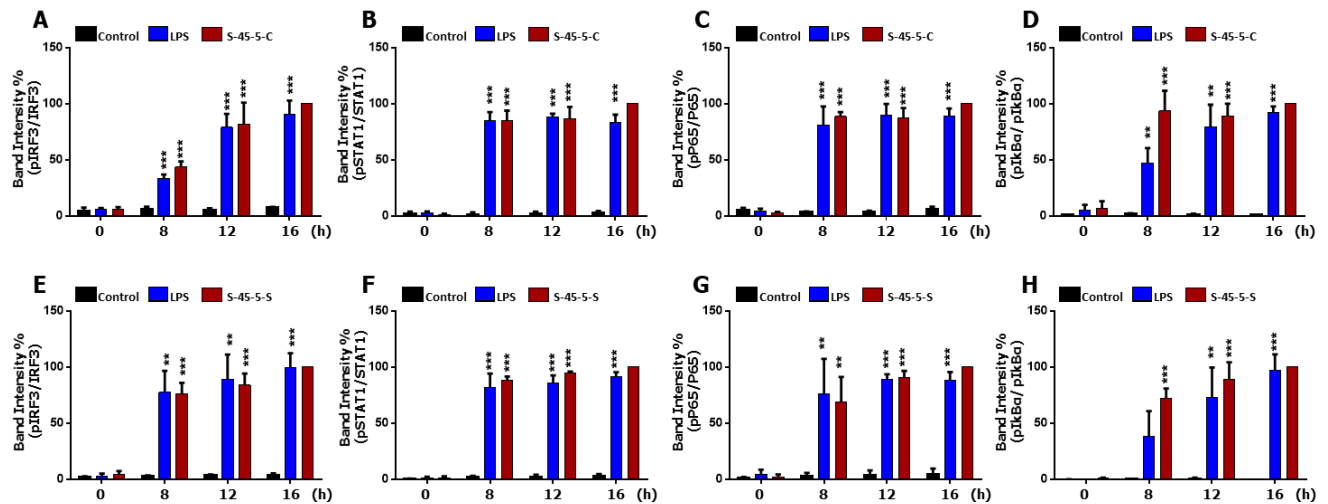

### Supplementary Figure S5.

Immunoblot band intensities of pIRF3, pSTAT1, pP65, and pIkB $\alpha$  were calculated using imageQuant LAS 4000 mini software. The phosphorylated protein band was normalized with its respective normal protein band intensity. Band intensity percentage (16 h time point of S-45-5 set as 100%) results are expressed as mean  $\pm$  standard deviations (SD). Error bars indicate the range of values obtained from three independent experiments (Figure 2B-C, Supplementary Figure 4A-D) (A-D, *C. butyricum* S-45-5-Cell, E-H, *C. butyricum* S-45-5-Sup) (\*\* p < 0.01, \*\*\* p < 0.001 regarded as a significant difference). (S-45-5-C: *C. butyricum* S-45-5-Cell, S-45-5-S *C. butyricum* S-45-5-Sup).

**A**

| Day | PBS      |          | H1N1     |          | S-45-5 Cell |          |             | S-45-5 Sup |          |             | S-45-5 Mix |          |             | S-45-5 IFN-β |          |             |
|-----|----------|----------|----------|----------|-------------|----------|-------------|------------|----------|-------------|------------|----------|-------------|--------------|----------|-------------|
|     | Mean     | SD       | Mean     | SD       | Mean        | SD       | Significant | Mean       | SD       | Significant | Mean       | SD       | Significant | Mean         | SD       | Significant |
| 1   | 100      | 0        | 100      | 0        | 100         | 0        |             | 100        | 0        |             | 100        | 0        |             | 100          | 0        |             |
| 2   | 104.0039 | 1.503692 | 98.62049 | 1.233611 | 98.2188     | 1.051993 |             | 91.64894   | 3.202566 | *           | 95.97871   | 2.693312 |             | 94.83488     | 2.960346 |             |
| 3   | 99.64742 | 3.707882 | 93.94147 | 1.422014 | 94.31966    | 2.284974 |             | 93.76262   | 5.618426 |             | 93.17609   | 4.60984  |             | 95.63188     | 5.378263 |             |
| 4   | 103.424  | 1.778368 | 91.5405  | 1.570954 | 94.64347    | 1.260846 |             | 93.86357   | 4.432463 | *           | 95.48009   | 2.610809 |             | 93.94106     | 4.722282 |             |
| 5   | 105.0088 | 1.714898 | 88.53168 | 2.460854 | 93.39538    | 2.342229 | *           | 91.42929   | 3.737944 |             | 92.79456   | 4.414179 |             | 92.88586     | 3.748953 |             |
| 6   | 99.28499 | 1.855969 | 85.67216 | 3.510731 | 92.10305    | 2.463625 | *           | 92.11883   | 6.862363 |             | 91.32144   | 7.075628 |             | 93.16488     | 4.711483 |             |
| 7   | 103.4207 | 1.647183 | 83.52134 | 2.744004 | 87.10225    | 3.05569  |             | 90.14635   | 7.390393 |             | 90.71423   | 7.210253 |             | 92.74355     | 8.48865  |             |
| 8   | 102.0879 | 3.03704  | 79.73915 | 4.301113 | 88.91248    | 6.31117  |             | 88.66495   | 8.783946 |             | 88.64856   | 9.43495  |             | 91.26819     | 8.142756 |             |
| 9   | 101.2198 | 3.940978 | 78.43733 | 4.025306 | 88.82505    | 7.650001 |             | 87.34402   | 9.599289 |             | 87.04358   | 7.292349 |             | 93.15732     | 3.834199 | *           |
| 10  | 99.93129 | 3.390288 | 78.99764 | 5.214082 | 89.21484    | 8.592044 |             | 92.05403   | 10.02759 |             | 94.19553   | 2.674113 | *           | 94.41358     | 5.763445 | *           |
| 11  | 101.8067 | 5.115463 | 76.8452  | 3.034532 | 87.13392    | 8.436063 |             | 91.95508   | 10.06093 |             | 94.13741   | 2.785791 | *           | 94.98975     | 4.460466 | *           |
| 12  | 102.7175 | 4.571857 | 77.98568 | 3.353211 | 94.64856    | 4.977226 | *           | 93.19496   | 10.82187 | *           | 96.1027    | 3.015811 | *           | 94.57008     | 3.131052 | *           |
| 13  | 103.1554 | 3.30456  | 78.85322 | 4.663061 | 97.62181    | 2.833417 | *           | 97.90397   | 1.435808 | *           | 98.16636   | 3.564618 | *           | 97.23169     | 3.374127 | *           |

**B**

| Day | PBS      |           | H3N2     |           | S-45-5 Cell |          |             | S-45-5 Sup |          |             | S-45-5 Mix |          |             | S-45-5 IFN-β |          |             |
|-----|----------|-----------|----------|-----------|-------------|----------|-------------|------------|----------|-------------|------------|----------|-------------|--------------|----------|-------------|
|     | Mean     | SD        | Mean     | SD        | Mean        | SD       | Significant | Mean       | SD       | Significant | Mean       | SD       | Significant | Mean         | SD       | Significant |
| 1   | 100      | 0         | 100      | 0         | 100         | 0        |             | 100        | 0        |             | 100        | 0        |             | 100          | 0        |             |
| 2   | 97.93919 | 0.7289436 | 96.30545 | 0.6230653 | 97.58063    | 2.4864   |             | 97.19714   | 1.518929 |             | 95.92619   | 1.430485 |             | 99.49355     | 2.769705 |             |
| 3   | 98.86887 | 1.921113  | 94.67005 | 1.948315  | 97.66923    | 3.646497 |             | 96.62416   | 1.112845 |             | 94.6077    | 3.377521 |             | 100.6302     | 3.83274  |             |
| 4   | 100.7146 | 2.067173  | 93.79419 | 3.502308  | 97.06611    | 4.726394 |             | 94.33588   | 1.454781 |             | 93.30072   | 4.942728 |             | 98.60088     | 4.032623 |             |
| 5   | 101.1907 | 1.921208  | 90.14584 | 5.516561  | 95.01874    | 6.514047 |             | 92.24561   | 3.456598 |             | 90.46125   | 5.134038 |             | 98.08046     | 5.036587 |             |
| 6   | 102.9892 | 1.519387  | 87.37349 | 7.650084  | 93.34343    | 7.697055 |             | 91.02279   | 6.557214 |             | 90.17062   | 7.578773 |             | 96.72352     | 6.16074  |             |
| 7   | 101.6849 | 1.285927  | 82.50835 | 7.392198  | 91.24674    | 9.117389 |             | 89.33415   | 5.713017 |             | 88.7823    | 7.725627 |             | 92.49712     | 5.509496 |             |
| 8   | 102.3287 | 1.494883  | 81.90999 | 5.221354  | 90.24814    | 9.231503 |             | 87.79335   | 6.551573 |             | 87.94066   | 9.523476 |             | 94.01028     | 7.568208 |             |
| 9   | 104.0967 | 1.081403  | 77.91548 | 6.001976  | 90.43963    | 11.27194 |             | 86.93291   | 8.635462 |             | 92.16087   | 7.881972 |             | 94.54747     | 10.83646 |             |
| 10  | 103.9926 | 1.767157  | 77.59879 | 4.814394  | 94.69328    | 11.46591 |             | 85.83219   | 8.721869 |             | 89.55014   | 8.29568  |             | 92.60189     | 11.03828 |             |
| 11  | 103.6152 | 1.000771  | 76.59187 | 3.530916  | 101.768     | 2.673264 | *           | 83.96742   | 11.20969 |             | 90.27489   | 8.81633  |             | 97.35837     | 5.355584 | *           |
| 12  | 103.4086 | 1.252783  | 76.50529 | 4.369424  | 101.8061    | 3.048892 | *           | 93.70305   | 3.016355 |             | 97.22658   | 1.807316 | *           | 101.0723     | 3.860198 | *           |
| 13  | 105.3943 | 1.068128  | 76.56615 | 5.715469  | 102.9573    | 3.937316 | *           | 94.82299   | 2.500694 |             | 99.90253   | 4.10773  | *           | 101.2514     | 4.520144 | *           |

**C**

| Day | PBS      |           | H9N2     |           | S-45-5 Cell |          |             | S-45-5 Sup |           |             | S-45-5 Mix |          |             | S-45-5 IFN-β |          |             |
|-----|----------|-----------|----------|-----------|-------------|----------|-------------|------------|-----------|-------------|------------|----------|-------------|--------------|----------|-------------|
|     | Mean     | SD        | Mean     | SD        | Mean        | SD       | Significant | Mean       | SD        | Significant | Mean       | SD       | Significant | Mean         | SD       | Significant |
| 1   | 100      | 0         | 100      | 0         | 100         | 0        |             | 100        | 0         |             | 100        | 0        |             | 100          | 0        |             |
| 2   | 99.68385 | 1.294653  | 97.31908 | 0.6764152 | 97.98547    | 1.737029 |             | 98.23751   | 0.8228639 |             | 96.55152   | 2.063488 |             | 98.81599     | 1.512507 |             |
| 3   | 100.0434 | 0.9674618 | 94.26427 | 2.306568  | 95.53967    | 2.362307 |             | 95.80997   | 1.734265  |             | 94.826     | 3.889638 |             | 99.80183     | 2.540013 | *           |
| 4   | 100.14   | 0.8026579 | 89.13982 | 1.170721  | 92.49159    | 1.729405 |             | 92.43399   | 1.270777  | *           | 93.45083   | 5.342535 |             | 98.5025      | 2.658692 | *           |
| 5   | 100.6028 | 1.225845  | 84.74516 | 1.715179  | 89.17064    | 1.147092 | *           | 90.40976   | 2.830007  | *           | 90.51053   | 5.409178 |             | 97.93371     | 4.415377 | *           |
| 6   | 100.5423 | 1.331248  | 80.72176 | 4.01806   | 87.0692     | 1.6598   | *           | 87.75789   | 4.794542  |             | 90.3916    | 8.071802 |             | 96.36852     | 5.442514 | *           |
| 7   | 100.8754 | 1.318635  | 80.02673 | 3.1525    | 86.62446    | 4.563458 | *           | 88.04528   | 5.137773  |             | 89.08768   | 8.321765 |             | 92.81817     | 6.298597 | *           |
| 8   | 101.0432 | 1.329386  | 77.77589 | 2.065275  | 86.92544    | 7.566965 |             | 88.46043   | 6.663013  |             | 88.2101    | 10.00366 |             | 93.31111     | 11.67007 |             |
| 9   | 101.0604 | 1.505786  | 75.79811 | 1.833194  | 90.67948    | 3.493809 |             | 89.43857   | 7.990681  |             | 92.28023   | 8.074899 |             | 96.06741     | 7.515854 | *           |
| 10  | 102.7307 | 1.666425  | 74.62377 | 0         | 91.3674     | 3.468644 | *           | 90.13708   | 8.983928  |             | 90.29366   | 8.922382 |             | 96.33795     | 4.877106 |             |
| 11  | 103.1445 | 1.673243  |          |           | 94.08945    | 1.78976  |             | 96.30263   | 5.020638  |             | 90.92047   | 9.506289 |             | 97.0387      | 4.367816 |             |
| 12  | 102.9579 | 1.612838  |          |           | 94.18803    | 2.52469  |             | 98.17591   | 4.427733  |             | 97.43616   | 1.261535 |             | 99.99184     | 3.598008 |             |
| 13  | 103.4903 | 2.059858  |          |           | 95.55286    | 2.601823 |             | 100.2868   | 2.631272  |             | 100.0806   | 4.023767 |             | 100.232      | 2.677874 |             |

### Supplementary Figure S6.

Six-week-old female BALB/c mice were orally administrated with *C. butyricum* S-45-5-Mix ( $5 \times 10^7$  CFU) (n=6), or *C. butyricum* S-45-5-Cell ( $5 \times 10^7$  CFU) (n=6) or *C. butyricum* S-45-5-Sup ( $5 \times 10^7$  CFU) (n=6) in a total volume of 100  $\mu$ l and control mice (PBS, Virus only, IFN- $\beta$ ) with 100  $\mu$ l of PBS daily for 21 days as separate groups. Twelve hours before infection, mice in the positive control group were intranasally inoculated with 1000 units of rmIFN- $\beta$ . Except for the PBS group, all mice were intranasally infected with 2MLD<sub>50</sub> of H1N1, H3N2, and H9N2 influenza A subtypes. Except for the PBS group, all mice were intranasally infected with 2MLD<sub>50</sub> of H1N1 or, H3N2, or H9N2 influenza A subtypes. Average body weight percentages and standard deviation are shown in the table. \* p < 0.05 regarded as a significant difference (two-tailed student's t-test).

**Supplementary Table S1.** Genomic characteristics of *C. butyricum* S-45-5

| Attribute              | S-45-5        |
|------------------------|---------------|
| Accession no.          | GCA_003315755 |
| Coverages (×)          | 263           |
| N50 length (bp)        | 3,810,128     |
| Genome size (bp)       | 4,588,510     |
| DNA G+C content (mol%) | 28.7          |
| No. of contigs         | 2             |
| No. of CDS             | 4,077         |
| rRNAs                  | 28            |
| tRNAs                  | 87            |

**Supplementary Table S2.** Average Nucleotide Identity (ANI), and digital DNA-DNA hybridization (dDDH) values for *C. butyricum* S-45-5 and related strains in the species *C. butyricum*

| No. | GenBank Accession | Strain           | dDDH | ANI  | Size (Mp) | WGS Accession | Assembly Level | Release Date |
|-----|-------------------|------------------|------|------|-----------|---------------|----------------|--------------|
|     |                   |                  | (%)  | (%)  |           |               |                |              |
| 1   | GCA_00331         | S-45-5           | 100  | 100  | 4.6       | -             | Complete       | Jul, 2018    |
| 2   | GCA_00514         | 4-1              | 96.3 | 99.6 | 4.6       | -             | Complete       | May, 2019    |
| 3   | GCA_01311         | 16-3             | 96.3 | 99.6 | 4.6       | -             | Complete       | May, 2020    |
| 4   | GCA_01314         | DJ064            | 96.3 | 99.6 | 4.6       | JABFUG01      | Contig         | May, 2020    |
| 5   | GCA_01413         | DJ046            | 96.3 | 99.6 | 4.7       | JACJHS01      | Contig         | Aug, 2020    |
| 6   | GCA_01413         | DJ075            | 96.3 | 99.6 | 4.6       | JACGZE01      | Contig         | Aug, 2020    |
| 7   | GCA_02665         | QXYZ514          | 96.3 | 99.6 | 4.6       | -             | Complete       | Dec, 2022    |
| 8   | GCA_02762         | LV1              | 96.3 | 99.6 | 4.6       | -             | Complete       | Jan, 2023    |
| 9   | GCA_03038         | DKU-11           | 96.3 | 99.6 | 4.6       | -             | Complete       | Jul, 2023    |
| 10  | GCA_00087         | HM-68            | 96.2 | 99.6 | 4.6       | JXBT01        | Contig         | Feb, 2015    |
| 11  | GCA_00799         | NBRC 3315        | 96.2 | 99.5 | 4.5       | BKBB01        | Contig         | Jul, 2019    |
| 12  | GCA_01423         | DJ013            | 96.2 | 99.6 | 4.5       | JAAZWPO       | Contig         | Aug, 2020    |
| 13  | GCA_02596         | NPLps03.gc       | 96.2 | 99.6 | 4.5       | JAOZWJ01      | Contig         | Nov, 2022    |
| 14  | GCA_00345         | AF25-25          | 96.1 | 99.6 | 4.5       | QRUG01        | Scaffold       | Sep, 2018    |
| 15  | GCA_01735         | DS501            | 95.7 | 99.5 | 3.9       | -             | Chromosome     | Mar, 2021    |
| 16  | GCA_03029         | SJ1              | 95.7 | 99.5 | 3.9       | -             | Complete       | Jun, 2023    |
| 17  | GCA_02767         | AM32-13          | 95.3 | 99.6 | 4.5       | JAQEUBU01     | Scaffold       | Jan, 2023    |
| 18  | GCA_02767         | AM21-3LB         | 95.3 | 99.3 | 4.5       | JAQDZY01      | Scaffold       | Jan, 2023    |
| 19  | GCA_01566         | 1001311H_170123_ | 95.0 | 99.4 | 4.5       | JADPEK01      | Scaffold       | Nov, 2020    |
| 20  | GCA_01566         | D52t1_170925_F3  | 94.4 | 99.4 | 4.6       | JADPLV01      | Scaffold       | Nov, 2020    |
| 21  | GCA_02821         | D52st1_A4_D52t1_ | 94.3 | 99.4 | 4.6       | JAQLDD01      | Scaffold       | Jan, 2023    |
| 22  | GCA_01756         | GGCC_0151        | 94.2 | 99.3 | 3.8       | JABFCF01      | Contig         | Mar, 2021    |
| 23  | GCA_03003         | MALS002          | 94.1 | 99.4 | 4.6       | JALGRX01      | Contig         | May, 2023    |
| 24  | GCA_02821         | BSD3178071175st2 | 93.9 | 99.3 | 4.7       | JAQLDE01      | Scaffold       | Jan, 2023    |
| 25  | GCA_00965         | CFSA3987         | 93.8 | 99.3 | 4.7       | -             | Complete       | Nov, 2019    |
| 26  | GCA_00965         | CFSA3989         | 93.8 | 99.3 | 4.7       | -             | Complete       | Nov, 2019    |
| 27  | GCA_93275         | DSM 107392       | 93.8 | 99.3 | 4.6       | CAKODI01      | Contig         | Mar, 2022    |
| 28  | GCA_90236         | MGYG-HGUT-00014  | 93.6 | 99.3 | 4.6       | CABIVR01      | Scaffold       | Aug, 2019    |
| 29  | GCA_01567         | D33t1_170424_B3  | 93.5 | 99.2 | 4.6       | JADPCQ01      | Scaffold       | Nov, 2020    |

## Supplementary Material

|    |           |                   |      |      |     |          |          |           |
|----|-----------|-------------------|------|------|-----|----------|----------|-----------|
| 30 | GCA_90520 | SRR7721873-bin.10 | 93.4 | 99.2 | 4.6 | CAJKPI01 | Contig   | Feb, 2021 |
| 31 | GCA_01566 | 1001287H_170206_  | 93.0 | 99.2 | 4.5 | JADPAI01 | Scaffold | Nov, 2020 |
| 32 | GCA_02768 | AF13-51           | 93.0 | 99.2 | 4.7 | JAQCUK01 | Scaffold | Jan, 2023 |
| 33 | GCA_02768 | AF13-166.0        | 93.0 | 99.2 | 4.6 | JAQCUF01 | Scaffold | Jan, 2023 |
| 34 | GCA_90216 | 4928STDY7387863   | 93.0 | 99.2 | 4.6 | CABHIF01 | Scaffold | Jul, 2019 |
| 35 | GCA_00141 | SU1               | 92.9 | 99.2 | 4.9 | LIDW01   | Contig   | Oct, 2015 |
| 36 | GCA_02439 | LCL-063           | 92.9 | 99.2 | 4.5 | JAJDMU0  | Scaffold | Jul, 2022 |
| 37 | GCA_00037 | 60E.3             | 92.8 | 99.2 | 4.6 | AGYK01   | Scaffold | Apr, 2013 |
| 38 | GCA_00145 | NEC8              | 92.7 | 99.2 | 4.8 | CBYK01   | Contig   | Feb, 2014 |
| 39 | GCA_02768 | AF13-10-6.0-r     | 92.6 | 99.2 | 4.6 | JAQCUC0  | Scaffold | Jan, 2023 |
| 40 | GCA_00094 | CWBI1009          | 92.4 | 99.1 | 4.5 | ASPQ01   | Contig   | Mar, 2015 |
| 41 | GCA_00987 | BIOML-A2          | 92.4 | 99.2 | 4.7 | WWTZ01   | Contig   | Jan, 2020 |
| 42 | GCA_02439 | LCL-155           | 92.1 | 99.2 | 4.6 | JAJDMT01 | Scaffold | Jul, 2022 |
| 43 | GCA_01814 | CBUT              | 91.9 | 99.1 | 4.5 | -        | Complete | Apr, 2021 |
| 44 | GCA_93797 | SRR3546782_bin.56 | 91.9 | 99.1 | 4.5 | CALJIR01 | Contig   | Jan, 2023 |
| 45 | GCA_00040 | DSM 10702         | 91.8 | 99.1 | 4.6 | AQQF01   | Contig   | Jun, 2013 |
| 46 | GCA_00674 | NBRC 13949        | 91.8 | 99.0 | 4.7 | -        | Complete | Jun, 2019 |
| 47 | GCA_00799 | NBRC 13949        | 91.8 | 99.1 | 4.6 | BKBD01   | Contig   | Jul, 2019 |
| 48 | GCA_01413 | DSM 10702         | 91.8 | 99.1 | 4.7 | -        | Complete | Aug, 2020 |
| 49 | GCA_02439 | KZ-1890           | 91.8 | 99.1 | 4.6 | JAJDMV01 | Scaffold | Jul, 2022 |
| 50 | GCA_02439 | CFSA-TJ-E         | 91.8 | 99.1 | 4.7 | -        | Complete | Jul, 2022 |
| 51 | GCA_01101 | H102020561        | 91.7 | 99.1 | 4.7 | SGLE01   | Contig   | Feb, 2020 |
| 52 | GCA_01101 | H102020560        | 91.7 | 99.1 | 4.7 | SGLF01   | Contig   | Feb, 2020 |
| 53 | GCA_02007 | LY33              | 91.7 | 99.0 | 4.6 | JAIQXW01 | Scaffold | Sep, 2021 |
| 54 | GCA_02439 | KZ-1886           | 91.7 | 99.1 | 4.6 | JAJDMW0  | Scaffold | Jul, 2022 |
| 55 | GCA_00035 | DKU-01            | 91.4 | 99.0 | 4.5 | APKZ01   | Contig   | Apr, 2013 |
| 56 | GCA_00145 | KNU-L09           | 91.4 | 99.0 | 4.6 | -        | Complete | Dec, 2015 |
| 57 | GCA_00146 | JKY6D1            | 91.4 | 99.0 | 4.6 | -        | Complete | Dec, 2015 |
| 58 | GCA_00164 | TOA               | 91.4 | 99.0 | 4.6 | -        | Complete | May, 2016 |
| 59 | GCA_00514 | 29-1              | 91.3 | 99.0 | 4.6 | JALAYW01 | Contig   | Mar, 2022 |
| 60 | GCA_01337 | HYCB              | 91.3 | 99.0 | 4.5 | JABXWN0  | Contig   | Jun, 2020 |
| 61 | GCA_03037 | ET61              | 91.2 | 99.0 | 4.4 | JAUDBX01 | Contig   | Jun, 2023 |
| 62 | GCA_03037 | Avi11             | 91.1 | 99.0 | 4.5 | JAUDDA0  | Contig   | Jun, 2023 |
| 63 | GCA_00076 | INCQS635          | 90.3 | 99.0 | 4.4 | JRMA01   | Contig   | Oct, 2014 |
| 64 | GCA_00017 | 5521              | 85.7 | 98.4 | 4.5 | ABDT01   | Contig   | Apr, 2008 |
| 65 | GCA_00018 | BoNT E BL5262     | 85.7 | 98.4 | 4.8 | ACOM01   | Scaffold | May, 2009 |
| 66 | GCA_01101 | ATCC 43755        | 85.6 | 98.4 | 4.5 | SWXL01   | Contig   | Feb, 2020 |
| 67 | GCA_01101 | BL-5262-9RE       | 85.5 | 98.4 | 4.7 | SWZQ01   | Contig   | Feb, 2020 |
| 68 | GCA_00188 | CDC_51208         | 85.3 | 98.4 | 4.6 | -        | Complete | Nov, 2016 |
| 69 | GCA_00384 | JKT37             | 84.2 | 98.3 | 4.2 | RQKF01   | Scaffold | Nov, 2018 |
| 70 | GCA_00973 | S3                | 83.4 | 98.2 | 4.4 | WOFV02   | Scaffold | Jan, 2020 |
| 71 | GCA_01991 | GD1_1             | 82.9 | 98.0 | 4.5 | JAIOKK01 | Scaffold | Sep, 2021 |
| 72 | GCA_00050 | DORA_1            | 82.6 | 98.1 | 4.0 | AZLX01   | Scaffold | Dec, 2013 |
| 73 | GCA_01314 | DJ065             | 82.6 | 98.1 | 4.7 | JABFUH01 | Contig   | May, 2020 |
| 74 | GCA_00799 | NBRC 3858         | 82.4 | 98.1 | 4.5 | BKBC01   | Contig   | Jul, 2019 |
| 75 | GCA_01555 | 1001713B170214_1  | 81.3 | 97.8 | 4.6 | JADNPC01 | Scaffold | Nov, 2020 |
| 76 | GCA_02821 | 1001713st1_G1_10  | 81.3 | 97.8 | 4.6 | JAQLDF01 | Scaffold | Jan, 2023 |
| 77 | GCA_94738 | B111              | 80.9 | 97.8 | 4.4 | CANCWBO  | Contig   | Apr, 2023 |
| 78 | GCA_94738 | B067              | 80.2 | 97.8 | 3.7 | CANCWAO  | Contig   | Apr, 2023 |
| 79 | GCA_00294 | 300064            | 79.9 | 97.7 | 4.7 | LRDH01   | Contig   | Feb, 2018 |
| 80 | GCA_01837 | L3_063_040G1_das  | 79.8 | 97.8 | 4.5 | JAHAI01  | Contig   | May, 2021 |
| 81 | GCA_00042 | AGR2140           | 79.3 | 97.7 | 4.6 | AUJN01   | Scaffold | Jul, 2013 |
| 82 | GCA_00078 | NOR 33234         | 78.8 | 97.6 | 4.9 | JSEG01   | Contig   | Nov, 2014 |



**Supplementary Table S3.** Mouse primer sets used to confirm mRNA expression

| Gene                           | Primers                        |                                |
|--------------------------------|--------------------------------|--------------------------------|
|                                | Forward                        | Reverse                        |
| <b>IFN-<math>\beta</math></b>  | 5'-TCCAAGAAAGGACGAACATTCG-3'   | 5'-TGCGGACATCTCCCACGTCAA-3'    |
| <b>IFN-<math>\alpha</math></b> | 5'-CTCTCCTGCCTGAAGGACAGGAAG-3' | 5'-GGTGGAGGTCATTGCAGAATGAGT-3' |
| <b>IL-6</b>                    | 5'-TCCATCCAGTTGCCTTCTTGG-3'    | 5'-CCACGATTGCCAGAGAACATG-3'    |
| <b>ISG-15</b>                  | 5'-CAATGGCCTGGGACCTAAA-3'      | 5'-CTTCTTCAGTTCTGACACCGTCAT-3' |
| <b>ISG-20</b>                  | 5'-AGAGATCACGGACTACAGAA-3'     | 5'-TCTGTGGACGTGCATAGAT-3'      |
| <b>ISG-56</b>                  | 5'-AGAGAACAGCTACCACCTTT-3'     | 5'-TGGACCTGCTCTGAGATTCT-3'     |
| <b>OAS-1<math>\beta</math></b> | 5'-GAGGCGGTTGGCTGAAGAGG-3'     | 5'-GAGGAAGGCTGGCTGTGATTGG-3'   |
| <b>GBP-1</b>                   | 5'-AAAACTTCGGGGACAGCTT-3'      | 5'-CTGAGTCACCTCATAAGCCAAA-3'   |
| <b>Mx1</b>                     | 5'-ACAAGCACAGGAAACCGTATCAG-3'  | 5'-AGGCAGTTTGGACCATCTTAGTG-3'  |
| <b>GAPDH</b>                   | 5'-TGACCACAGTCCATGCCATC-3'     | 5'-GACGGACACATTGGGGGTAG-3'     |

**Supplementary Table S4.** *In vivo* (mouse) experiment summary

| Group                                            | Treatment   | Administration Dose        | Administration Route & Duration | Challenged Virus | Experiment                       |
|--------------------------------------------------|-------------|----------------------------|---------------------------------|------------------|----------------------------------|
| Negative Control (n=6)                           | PBS         | -                          | Oral for 21 days                | H1N1             | Survival rate                    |
| Positive Control (n=6)                           | IFN $\beta$ | 1000U                      | IN/12h prior infection          |                  |                                  |
| S-45-5 (n=18)<br>(Cell, Sup, Mix)                | S-45-5      | 5x10 <sup>7</sup> (cfu/mL) | Oral for 21 days                |                  |                                  |
| Negative Control (n=6)                           | PBS         | -                          | Oral for 21 days                | H3N2             | Survival rate                    |
| Positive Control (n=6)                           | IFN $\beta$ | 1000U                      | IN/12h prior infection          |                  |                                  |
| S-45-5 (n=18)<br>(Cell, Sup, Mix)                | S-45-5      | 5x10 <sup>7</sup> (cfu/mL) | Oral for 21 days                |                  |                                  |
| Negative Control (n=6)                           | PBS         | -                          | Oral for 21 days                | H9N2             | Survival rate                    |
| Positive Control (n=6)                           | IFN $\beta$ | 1000U                      | IN/12h prior infection          |                  |                                  |
| S-45-5 (n=18)<br>(Cell, Sup, Mix)                | S-45-5      | 5x10 <sup>7</sup> (cfu/mL) | Oral for 21 days                |                  |                                  |
| Negative Control (n=6)<br>3dpi (n=3), 5dpi (n=3) | PBS         | -                          | Oral for 21 days                | H1N1             | Lung titration<br>Histopathology |
| Positive Control (n=6)<br>3dpi (n=3), 5dpi (n=3) | IFN $\beta$ | 1000U                      | IN/12h prior infection          |                  | Lung titration<br>Histopathology |
| S-45-5 (n=18)<br>(Cell, Sup, Mix)                | S-45-5      | 5x10 <sup>7</sup> (cfu/mL) | Oral for 21 days                |                  | Lung titration<br>Histopathology |
